# Supplementary material for: Accelerating the drug-releasing performance by a flexible zinc–air fuel cell based on a polyacrylamide/cellulose nanofibril (PAM/CNF) hydrogel
Source: Royal Society of Chemistry journal article supplement (doi:10.1039/d4ta06566b), 2024-12-09
Supplement: d4ta06566b1.pdf [file d4ta06566b1.pdf]

## *Supporting Information*

### **Accelerating the Drug Releasing Performance by Flexible Zinc-Air Fuel Cell based on Polyacrylamide/Cellulose Nanofibril (PAM/CNF) Hydrogel**

Yang Yang<sup>a,b</sup>, Juan Jia<sup>a,b</sup>, Wang Zhang<sup>a,b</sup>, Qin Peng<sup>a,b</sup>, Rong Chen<sup>a,b\*</sup>, Dingding Ye<sup>a,b</sup>, Jun Li<sup>a,b</sup>, Xun Zhu<sup>a,b\*</sup>, Qiang Liao<sup>a,b</sup>

<sup>a</sup>Key Laboratory of Low-grade Energy Utilization Technologies and Systems, Ministry of Education, Chongqing University, Chongqing 400030, China

<sup>b</sup>Institute of Engineering Thermophysics, School of Energy and Powering Engineering, Chongqing University, Chongqing 400030, China

\* Corresponding author.

E-mail: [rchen@cqu.edu.cn](mailto:rchen@cqu.edu.cn) (Rong Chen); [zhuxun@cqu.edu.cn](mailto:zhuxun@cqu.edu.cn) (Xun Zhu).

*Supplementary Figures*

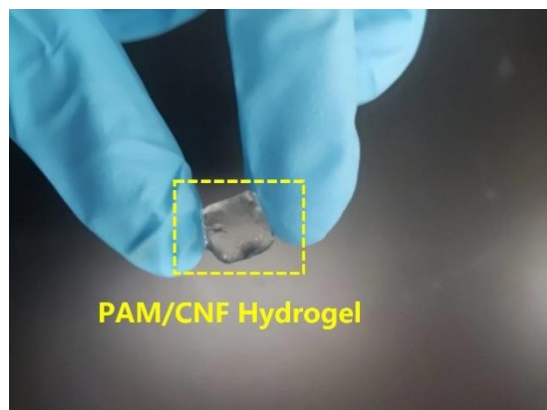

**Fig. S1** Diagram of synthesized PAM/CNF hydrogel.

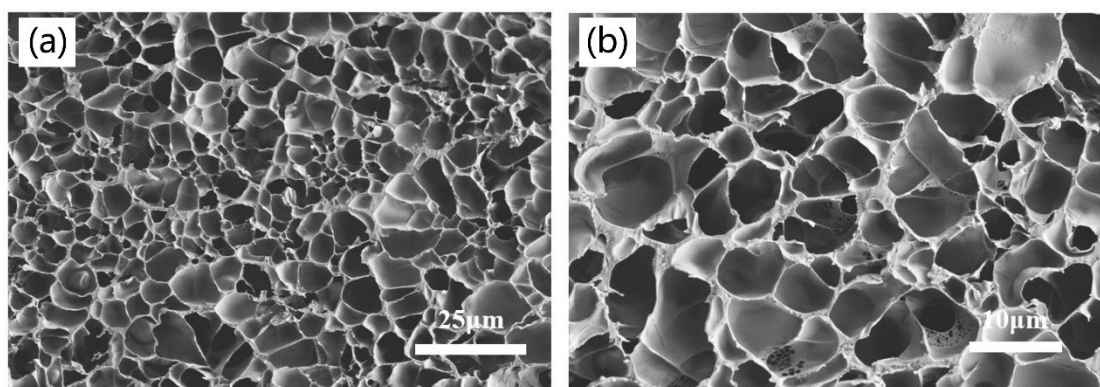

**Fig.S2** SEM images of PAM hydrogel at different magnifications.

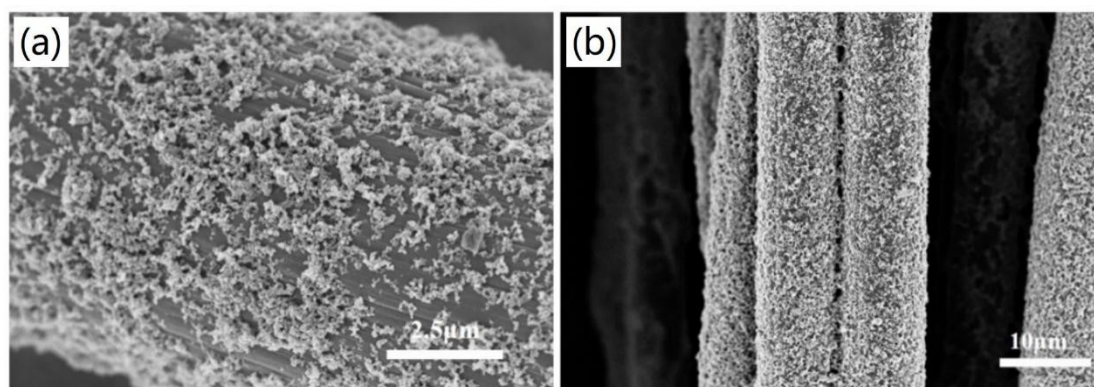

**Fig.S3** SEM images of cathode catalysts at different magnifications.

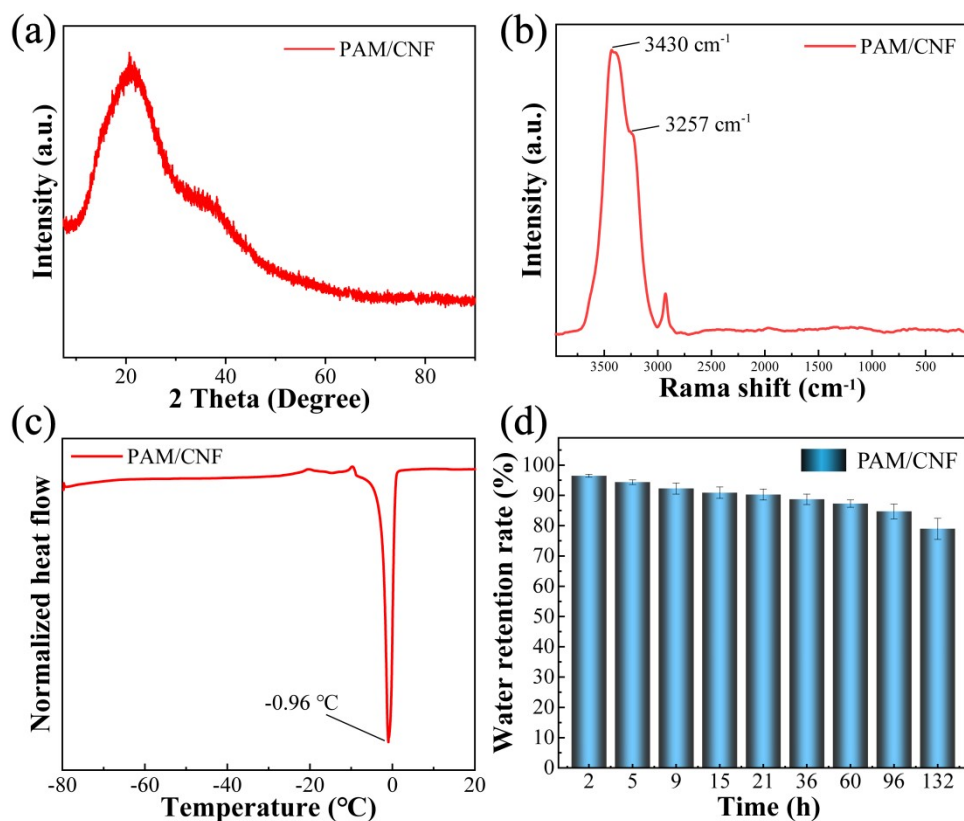

**Fig.S4** (a) XRD pattern, (b) Raman shift pattern, (c) DSC pattern, and (d) water retention rate of the PAM/CNF (6% CNF, 0.05% crosslinker) hydrogel.

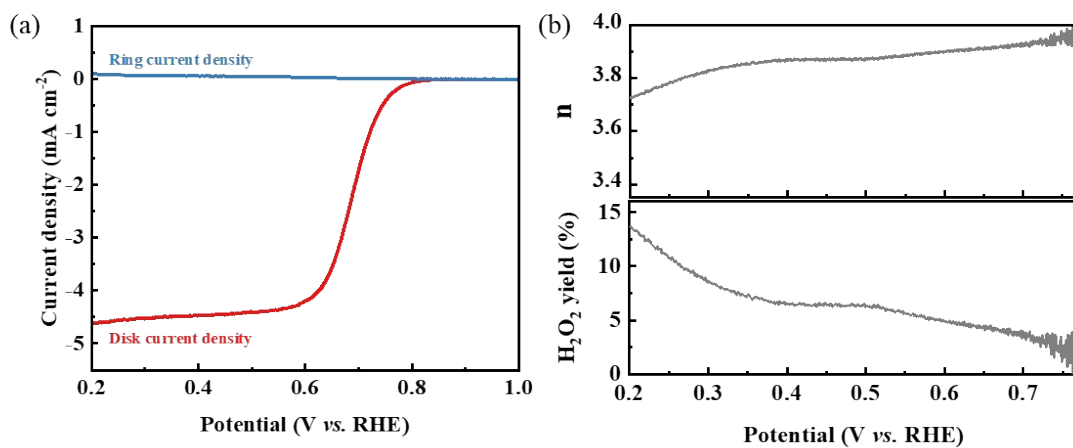

**Fig.S5** (a) LSV curves, (b) electron transfer number and H<sub>2</sub>O<sub>2</sub> yield of Co<sub>3</sub>O<sub>4</sub> catalysts in 0.1 M KOH electrolyte at a rotating speed of 1600 rpm with a scan rate of 10 mV s<sup>-1</sup> during the RRDE test.

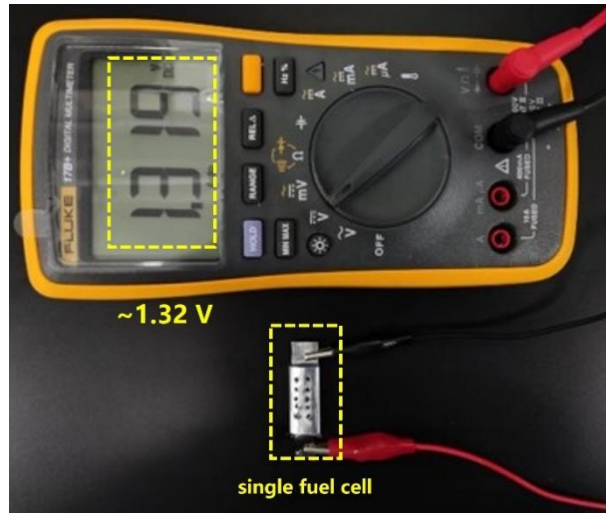

**Fig. S6** Diagram of open circuit potential for single flexible ZAFC.
